# Supplementary material
Source: MDPI journal article supplement (https://www.mdpi.com/2311-5637/9/1/30)
Supplement: s1 [file s1]

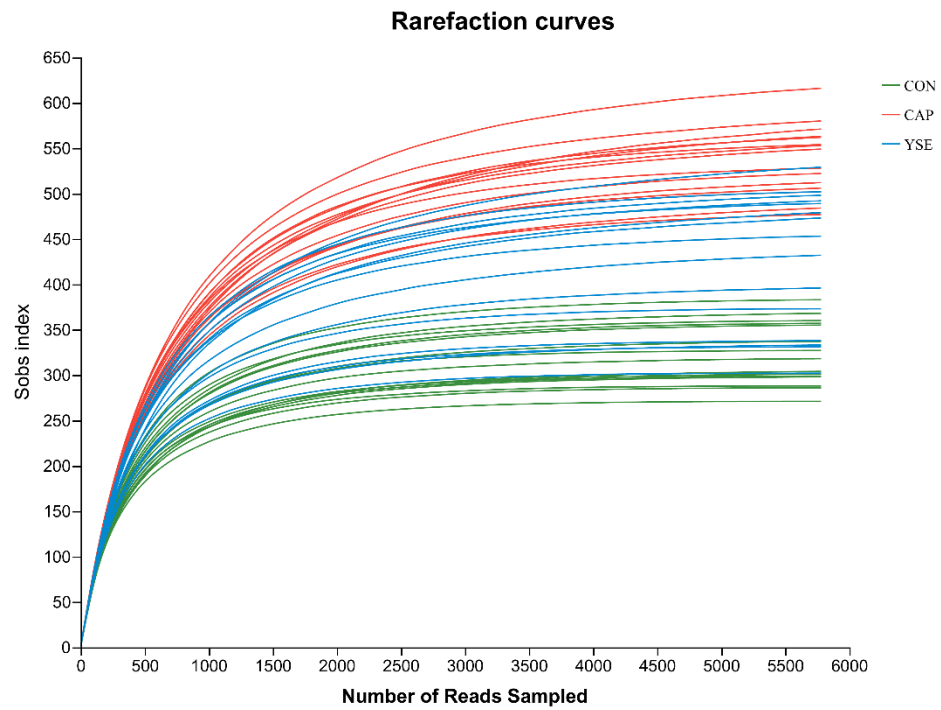

**Supplementary Figure S1.** Rarefaction curves of the groups. CON: control group; CAP: capsaicin group; YSE: yucca schidigera extract group.
